# Supplementary material for: Regulation of chromatin architecture by transcription factor binding
Source: eLife. 2024 Jan 19;12:RP91320. doi: 10.7554/eLife.91320 (PMC10945602; doi:10.7554/eLife.91320)
Supplement: Supplementary file 1. [file elife-91320-supp1.docx]

**Supporting Information for “Regulation of Chromatin Architecture by Transcription Factor Binding”**

Stephanie Portillo-Ledesma1,4, Suckwoo Chung1, Jill Hoffman1, and Tamar Schlick1,2,3,4*

1Department of Chemistry, 100 Washington Square East, Silver Building, New York University, New York, NY 10003 U.S.A.

2Courant Institute of Mathematical Sciences, New York University, 251 Mercer St., New York, NY 10012 U.S.A.

3New York University-East China Normal University Center for Computational Chemistry, New York University Shanghai, Shanghai 200122 China.

4Simons Center for Computational Physical Chemistry, 24 Waverly Place, Silver Building, New York University, New York, NY 10003 U.S.A.

*Correspondence: schlick@nyu.edu

**Supporting Table 1.** Setup of the Eed gene system. For each core is indicated the length of the linker DNA, if it has LH bound, and if its associated linker DNA has a Myc:Max binding site.

| **Core #** | **Linker DNA** | | **LH** | **Myc:Max** |
| --- | --- | --- | --- | --- |
|  | **Beads** | **bp** |  |  |
| 1 | 2 | 26 | 1 | 0 |
| 2 | 2 | 26 | 0 | 0 |
| 3 | 7 | 70 | 1 | 0 |
| 4 | 8 | 80 | 1 | 0 |
| 5 | 4 | 44 | 1 | 0 |
| 6 | 36 | 326 | 0 | 0 |
| 7 | 7 | 70 | 0 | 0 |
| 8 | 8 | 80 | 0 | 0 |
| 9 | 2 | 26 | 1 | 0 |
| 10 | 5 | 53 | 0 | 0 |
| 11 | 2 | 26 | 0 | 0 |
| 12 | 2 | 26 | 0 | 0 |
| 13 | 2 | 26 | 0 | 0 |
| 14 | 3 | 35 | 0 | 0 |
| 15 | 7 | 70 | 0 | 0 |
| 16 | 3 | 35 | 0 | 0 |
| 17 | 3 | 35 | 0 | 0 |
| 18 | 3 | 35 | 1 | 0 |
| 19 | 2 | 26 | 0 | 0 |
| 20 | 7 | 70 | 0 | 0 |
| 21 | 8 | 80 | 0 | 0 |
| 22 | 2 | 26 | 1 | 0 |
| 23 | 6 | 62 | 1 | 0 |
| 24 | 5 | 53 | 0 | 0 |
| 25 | 3 | 35 | 1 | 0 |
| 26 | 8 | 80 | 1 | 0 |
| 27 | 2 | 26 | 1 | 0 |
| 28 | 5 | 53 | 0 | 0 |
| 29 | 3 | 35 | 0 | 0 |
| 30 | 3 | 35 | 0 | 0 |
| 31 | 5 | 53 | 1 | 0 |
| 32 | 7 | 70 | 1 | 0 |
| 33 | 2 | 26 | 0 | 0 |
| 34 | 5 | 53 | 0 | 0 |
| 35 | 4 | 44 | 0 | 0 |
| 36 | 4 | 44 | 0 | 0 |
| 37 | 2 | 26 | 0 | 0 |
| 38 | 3 | 35 | 0 | 0 |
| 39 | 7 | 70 | 1 | 0 |
| 40 | 2 | 26 | 1 | 0 |
| 41 | 5 | 53 | 0 | 0 |
| 42 | 3 | 35 | 1 | 0 |
| 43 | 7 | 70 | 1 | 0 |
| 44 | 2 | 26 | 0 | 0 |
| 45 | 2 | 26 | 0 | 0 |
| 46 | 2 | 26 | 0 | 0 |
| 47 | 5 | 53 | 0 | 0 |
| 48 | 5 | 53 | 1 | 0 |
| 49 | 2 | 26 | 1 | 0 |
| 50 | 4 | 44 | 1 | 0 |
| 51 | 3 | 35 | 1 | 0 |
| 52 | 2 | 26 | 1 | 0 |
| 53 | 2 | 26 | 0 | 0 |
| 54 | 6 | 62 | 0 | 0 |
| 55 | 2 | 26 | 0 | 0 |
| 56 | 36 | 326 | 0 | 0 |
| 57 | 2 | 26 | 0 | 0 |
| 58 | 2 | 26 | 0 | 0 |
| 59 | 5 | 53 | 1 | 0 |
| 60 | 2 | 26 | 1 | 0 |
| 61 | 6 | 62 | 0 | 0 |
| 62 | 3 | 35 | 0 | 0 |
| 63 | 8 | 80 | 0 | 0 |
| 64 | 6 | 62 | 1 | 0 |
| 65 | 6 | 62 | 0 | 0 |
| 66 | 6 | 62 | 0 | 0 |
| 67 | 8 | 80 | 0 | 0 |
| 68 | 5 | 53 | 0 | 0 |
| 69 | 4 | 44 | 0 | 0 |
| 70 | 2 | 26 | 0 | 0 |
| 71 | 3 | 35 | 0 | 0 |
| 72 | 3 | 35 | 0 | 0 |
| 73 | 4 | 44 | 1 | 0 |
| 74 | 5 | 53 | 0 | 0 |
| 75 | 2 | 26 | 0 | 0 |
| 76 | 8 | 80 | 0 | 0 |
| 77 | 2 | 26 | 0 | 0 |
| 78 | 18 | 168 | 1 | 0 |
| 79 | 3 | 35 | 1 | 0 |
| 80 | 6 | 62 | 0 | 0 |
| 81 | 5 | 53 | 0 | 0 |
| 82 | 4 | 44 | 0 | 0 |
| 83 | 2 | 26 | 0 | 0 |
| 84 | 5 | 53 | 0 | 0 |
| 85 | 3 | 35 | 0 | 0 |
| 86 | 2 | 26 | 1 | 0 |
| 87 | 2 | 26 | 1 | 0 |
| 88 | 8 | 80 | 0 | 0 |
| 89 | 7 | 70 | 1 | 0 |
| 90 | 6 | 62 | 1 | 0 |
| 91 | 8 | 80 | 1 | 0 |
| 92 | 18 | 168 | 1 | 0 |
| 93 | 2 | 26 | 1 | 0 |
| 94 | 5 | 53 | 0 | 0 |
| 95 | 4 | 44 | 0 | 0 |
| 96 | 3 | 35 | 1 | 0 |
| 97 | 18 | 168 | 0 | 0 |
| 98 | 3 | 35 | 0 | 0 |
| 99 | 8 | 80 | 0 | 0 |
| 100 | 4 | 44 | 1 | 1 |
| 101 | 18 | 168 | 0 | 1 |
| 102 | 4 | 44 | 0 | 1 |
| 103 | 4 | 44 | 0 | 0 |
| 104 | 3 | 35 | 1 | 0 |
| 105 | 2 | 26 | 1 | 0 |
| 106 | 3 | 35 | 0 | 0 |
| 107 | 6 | 62 | 0 | 0 |
| 108 | 6 | 62 | 1 | 0 |
| 109 | 3 | 35 | 1 | 0 |
| 110 | 18 | 168 | 1 | 0 |
| 111 | 4 | 44 | 1 | 0 |
| 112 | 2 | 26 | 1 | 0 |
| 113 | 4 | 44 | 0 | 0 |
| 114 | 4 | 44 | 1 | 0 |
| 115 | 6 | 62 | 0 | 0 |
| 116 | 4 | 44 | 0 | 0 |
| 117 | 5 | 53 | 0 | 0 |
| 118 | 7 | 70 | 1 | 0 |
| 119 | 2 | 26 | 0 | 0 |
| 120 | 5 | 53 | 0 | 0 |
| 121 | 8 | 80 | 1 | 0 |
| 122 | 2 | 26 | 1 | 0 |
| 123 | 2 | 26 | 0 | 1 |
| 124 | 2 | 26 | 0 | 1 |
| 125 | 4 | 44 | 0 | 1 |
| 126 | 2 | 26 | 0 | 1 |
| 127 | 3 | 35 | 0 | 1 |
| 128 | 2 | 26 | 0 | 1 |
| 129 | 5 | 53 | 0 | 1 |
